# Supplementary material for: Evaluation of the Learning Curve Threshold in Robot-Assisted Thoracic Surgery for Lung Cancer: A Nationwide Population-Based Study
Source: Preprints.org preprint supplement (doi:10.20944/preprints202411.0491.v1), 2024-11-07
Supplement: Supplementary file 1 [file supplementary]

Supplementary Table 1. Logistic model regression for Clavien-Dindo ≥ II to estimate predicted risk of failure (clavien-dindo classification ≥ II) in patients operated by Robot-Assisted Thoracic Surgery

|  | Coefficient | P-value | 95% Confidence Interval | |
| --- | --- | --- | --- | --- |
| Age (years) | .0068 | 0.2 | -.005 | .018 |
| Female | -.01 | 0.9 | -.23 | .208 |
| Pulmonary disease | 1.32 | 0.000 | 1.09 | 1.54 |
| Heart disease | .64 | 0.000 | .36 | .92 |
| Peripheral vascular | .30 | 0.094 | -.05 | .65 |
| Neurological disease | 1.12 | 0.000 | .68 | 1.55 |
| Cirrhosis | -.072 | 0.9 | -1.11 | .97 |
| Renal disease | -.15 | 0.6 | -.72 | .41 |
| Metabolic disease | .16 | 0.3 | -.14 | .46 |
| Infectious disease | .275 | 0.8 | -2.03 | 2.56 |
| Hematologic disease | .55 | 0.11 | -.13 | 1.23 |
| Other disease | .055 | 0.7 | -.23 | .34 |
| Other treatment | -.084 | 0.6 | -.41 | .245 |
| Charlson score |  |  |  |  |
| 1 | -.083 | 0.65 | -.44 | .28 |
| 2 | -.44 | 0.03 | -.84 | -.04 |
| >=3 | -.20 | 0.26 | -.55 | .13 |
| Pulmonary resection |  |  |  |  |
| Lobectomy | 5.16 | 0.000 | 4.27 | 6.05 |
| Year |  |  |  |  |
| 2020 | -.156 | 0.54 | -.66 | .35 |
| 2021 | -.12 | 0.63 | -.60 | .36 |
| 2022 | -.15 | 0.54 | -.63 | .36 |
| Intercept | -11.46 | 0.000 | -13 | -10 |
